# Supplementary material for: The eNanoMapper database for nanomaterial safety information
Source: publisher site journal article supplement (doi:10.3762/bjnano.6.165), 2015-07-27
Supplement: Additional file 1 [file 2190-4286-6-165-S1.pdf]

## **Supporting Information**

for

### **The eNanoMapper database for nanomaterial safety information**

Nina Jeliaskova\*<sup>1</sup>, Charalampos Chomenidis<sup>2</sup>, Philip Doganis<sup>2</sup>, Bengt Fadeel<sup>3</sup>, Roland Grafström<sup>3</sup>, Barry Hardy<sup>4</sup>, Janna Hastings<sup>5</sup>, Markus Hegi<sup>4</sup>, Vedrin Jeliaskov<sup>1</sup>, Nikolay Kochev<sup>1,6</sup>, Pekka Kohonen<sup>3</sup>, Cristian R. Munteanu<sup>7,8</sup>, Haralambos Sarimveis<sup>2</sup>, Bart Smeets<sup>7</sup>, Pantelis Sopasakis<sup>2,9</sup>, Georgia Tsiliki<sup>2</sup>, David Vorgrimmler<sup>10</sup> and Egon Willighagen<sup>7</sup>

Address: <sup>1</sup>Ideaconsult Ltd., Sofia, Bulgaria; <sup>2</sup>National Technical University of Athens, School of Chemical Engineering, Athens, Greece; <sup>3</sup>Karolinska Institutet, Stockholm, Sweden; <sup>4</sup>Douglas Connect GmbH, Zeiningen, Switzerland; <sup>5</sup>European Molecular Biology Laboratory – European Bioinformatics Institute (EMBL-EBI), Hinxton, United Kingdom; <sup>6</sup>University of Plovdiv, Department of Analytical Chemistry and Computer Chemistry, Plovdiv, Bulgaria; <sup>7</sup>Department of Bioinformatics, NU-TRIM, Maastricht University, Maastricht, Netherlands; <sup>8</sup>Computer Science Faculty, University of A Coruña, A Coruña, Spain; <sup>9</sup>IMT Institute for Advanced Studies Lucca, Lucca, Italy and <sup>10</sup>in silico toxicology GmbH (IST), Basel, Switzerland

Email: Nina Jeliaskova\* - jeliaskova.nina@gmail.com

\* Corresponding author

### **OECD WPMN recommended endpoints**

*Supplemental file Endpoints recommended by OECD WPMN and relation to CODATA UDS and  
ISA-TAB-Nano*

| #                                                                 | Endpoints agreed by the OECD WPMN                                                      | OECD HT (XML schema)                            | CODATA UDS                                                                                                                      | ISA-TAB-Nano                                           |
|-------------------------------------------------------------------|----------------------------------------------------------------------------------------|-------------------------------------------------|---------------------------------------------------------------------------------------------------------------------------------|--------------------------------------------------------|
| <b>Nanomaterial Information / Identification</b>                  |                                                                                        |                                                 |                                                                                                                                 |                                                        |
| 1                                                                 | Nano material name                                                                     | SUBSTANCE                                       | Information Category/<br>General Identifiers                                                                                    | Material file                                          |
| 2                                                                 | CAS number                                                                             | SUBSTANCE                                       | Information Category/<br>Characterisation/Chemical composition                                                                  | Material file                                          |
| 3                                                                 | Structural formula/molecular structure                                                 | SUBSTANCE                                       | Information Category/<br>Characterisation/Chemical composition                                                                  | Material file                                          |
| 4                                                                 | Composition of NM being tested (incl. degree of purity, known impurities or additives) | SUBSTANCE                                       | Information Category/<br>Characterisation/Chemical composition;<br>Information Category/<br>Characterisation/Physical structure | Material file                                          |
| 5                                                                 | Basic Morphology                                                                       | GI_GENERAL_INF<br>FORM                          | Information Category/<br>Characterisation/Physical structure                                                                    | Material file                                          |
| 6                                                                 | Description of surface chemistry (e.g. coating or modification)                        | SUBSTANCE<br>SURFACE_CHEMISTRY                  | Information Category/<br>Characterisation/Surface description                                                                   | Material file<br>(nominal)<br>Assay file<br>(measured) |
| 7                                                                 | Major commercial uses                                                                  | PRODUCT_TYPE_U<br>SE,<br>DIRECTIONS_FOR<br>_USE |                                                                                                                                 |                                                        |
| 8                                                                 | Known catalytic activity                                                               | CATALYTIC_ACTI<br>VITY                          | Information Category/<br>Characterisation/Intensi<br>ve properties                                                              | Assay file                                             |
| 9                                                                 | Method of production (e.g. precipitation, gas phase)                                   | SUBSTANCE                                       | Information Category/<br>Production, Specification                                                                              | Study file<br>(protocol)                               |
| <b>Physical-chemical Properties and Material Characterization</b> |                                                                                        |                                                 |                                                                                                                                 |                                                        |
| 10                                                                | Agglomeration / aggregation                                                            | AGGLOMERATION<br>_AGGREGATION                   | Information Category/<br>Characterisation/Physical structure                                                                    | Assay file, Data file                                  |
| 11                                                                | Water solubility                                                                       | PC_WATER_SOL                                    | Information Category/<br>Characterisation/Interac<br>tion                                                                       | Assay file, Data file                                  |
| 12                                                                | Crystalline phase                                                                      | CRYSTALLINE_PH<br>ASE                           | Information Category/<br>Characterisation/<br>Crystallographic structure                                                        | Assay file, Data file                                  |
| 13                                                                | Dustiness                                                                              | DUSTINESS                                       |                                                                                                                                 | Assay file, Data file                                  |

|                             |                                                                     |                             |                                                                             |                          |
|-----------------------------|---------------------------------------------------------------------|-----------------------------|-----------------------------------------------------------------------------|--------------------------|
| 14                          | Crystallite size                                                    | CRYSTALLITE_AND_GRAIN_SIZE  | Information Category/<br>Characterisation/<br>Crystallographic<br>structure | Assay file, Data<br>file |
| 15                          | Representative TEM<br>picture(s)                                    | ATTACHMENTDOCUMENT          |                                                                             | Assay file, Data<br>file |
| 15                          | Particle size distribution                                          | PC_GRANULOMETRY             | Information Category/<br>Characterisation/<br>Size                          | Assay file, Data<br>file |
| 17                          | Specific surface area                                               | SPECIFIC_SURFACE_AREA       | Information Category/<br>Characterisation/<br>Surface description           | Assay file, Data<br>file |
| 18                          | Zeta potential (surface<br>charge)                                  | ZETA_POTENTIAL_SECTION      | Information Category/<br>Characterisation/<br>Interaction                   | Assay file, Data<br>file |
| 19                          | Surface chemistry (where<br>appropriate)                            | SURFACE_CHEMISTRY           | Information Category/<br>Characterisation/<br>Surface<br>description        | Assay file, Data<br>file |
| 20                          | Photo-catalytic activity                                            | PHOTOCATALYTIC_ACTIVITY     | Information Category/<br>Characterisation/<br>Interaction                   | Assay file, Data<br>file |
| 21                          | Pour density                                                        | POUR_DENSITY                | Information Category/<br>Characterisation/<br>Intensive<br>properties       | Assay file, Data<br>file |
| 22                          | Porosity                                                            | POROSITY                    | Information Category/<br>Characterisation/<br>Intensive<br>properties       | Assay file, Data<br>file |
| 23                          | Octanol-water partition<br>coefficient, where relevant              | PC_PARTITION                | Information Category/<br>Characterisation/<br>Intensive<br>properties       | Assay file, Data<br>file |
| 24                          | Redox potential                                                     |                             | Information Category/<br>Characterisation/<br>Interactions                  | Assay file, Data<br>file |
| 25                          | Radical formation                                                   | RADICAL_FORMATION_POTENTIAL | Information Category/<br>Characterisation/<br>Interactions                  | Assay file, Data<br>file |
| 26                          | Other relevant<br>information (where<br>available)                  | PC_OTHER                    |                                                                             | Assay file, Data<br>file |
| <b>Environmental Fate</b>   |                                                                     |                             |                                                                             |                          |
| 27                          | Dispersion stability in<br>water                                    |                             |                                                                             | Assay file, Data<br>file |
| <b>Biotic degradability</b> |                                                                     |                             |                                                                             |                          |
| 28                          | - Ready biodegradability                                            | TO_BIODEGRATER_SCREEN       | Information Category/<br>Characterisation/<br>Interactions                  | Assay file, Data<br>file |
| 29                          | - Simulation testing on<br>ultimate degradation in<br>surface water | TO_BIODEGRATER_SIM          | Information Category/<br>Characterisation/<br>Interactions                  | Assay file, Data<br>file |
| 30                          | - Soil simulation testing                                           |                             | Information Category/<br>Characterisation/<br>Interactions                  | Assay file, Data<br>file |

|                                       |                                                       |                                                                                         |                                                    |                       |
|---------------------------------------|-------------------------------------------------------|-----------------------------------------------------------------------------------------|----------------------------------------------------|-----------------------|
|                                       |                                                       |                                                                                         | Characterisation/Interactions                      | file                  |
| 31                                    | Sediment simulation testing                           |                                                                                         | Information Category/Characterisation/Interactions | Assay file, Data file |
| 32                                    | - Sewage treatment simulation testing                 |                                                                                         | Information Category/Characterisation/Interactions | Assay file, Data file |
| 33                                    | Identification of degradation product(s)              | EN_MAIN_DEGRADATION                                                                     | Information Category/Characterisation/Interactions | Assay file, Data file |
| 34                                    | Further testing of degradation product(s) as required |                                                                                         | Information Category/Characterisation/Interactions | Assay file, Data file |
| <b>Abiotic degradability and fate</b> |                                                       |                                                                                         |                                                    |                       |
| 35                                    | - Hydrolysis, for surface modified nanomaterials      | TO_HYDROLYSIS                                                                           | Information Category/Characterisation/Interactions | Assay file, Data file |
| 36                                    | Adsorption- desorption                                | EN_ADSORPTION                                                                           | Information Category/Characterisation/Interactions | Assay file, Data file |
| 37                                    | Adsorption to soil or sediment                        | EN_STABILITY_IN_SOIL                                                                    | Information Category/Characterisation/Interactions | Assay file, Data file |
| 38                                    | Bioaccumulation potential                             | EN_BIOACCUMULATION                                                                      | Information Category/Characterisation/Interactions | Assay file, Data file |
| 39                                    | Bioaccumulation in sediment                           | EN_BIOACCUTERR                                                                          | Information Category/Characterisation/Interactions | Assay file, Data file |
| <b>Environmental Toxicology</b>       |                                                       |                                                                                         |                                                    |                       |
| 40                                    | Effects on pelagic species (short/ long term)         | EC_FISHTOX,<br>EC_CHRONFISHTOX,<br>EC_DAPHNIATOX,<br>EC_CHRONDAPHNIATOX,<br>EC_ALGAETOX | Information Category/Characterisation/Interactions | Assay file, Data file |
| 41                                    | Effects on sediment species (short/ long term)        | EC_SEDIMENTDWELLINGTOX                                                                  | Information Category/Characterisation/Interactions | Assay file, Data file |
| 42                                    | Effects on soil species (short/ long term)            | EC_SOILDWELLINGTOX                                                                      | Information Category/Characterisation/Interactions | Assay file, Data file |
| 43                                    | Effect on terrestrial species                         | EC_PLANTTOX,<br>EC_HONEYBEESTOX                                                         | Information Category/Characterisation/Interactions | Assay file, Data file |
| 44                                    | Effect on micro-organisms                             | EC_SOIL_MICROTOX,<br>EC_BACTOX                                                          | Information Category/Characterisation/Interactions | Assay file, Data file |

|                             |                                |                                                              |                                                        |                       |
|-----------------------------|--------------------------------|--------------------------------------------------------------|--------------------------------------------------------|-----------------------|
|                             |                                |                                                              | tions                                                  |                       |
| 45                          | Other relevant information     |                                                              | Information Category/<br>Characterisation/Interactions | Assay file, Data file |
| <b>Mammalian Toxicology</b> |                                |                                                              |                                                        |                       |
| 46                          | Pharmacokinetics (ADME)        |                                                              | Information Category/<br>Characterisation/Interactions | Assay file, Data file |
| 47                          | Acute Toxicity                 | TO_ACUTE_ORAL,<br>TO_ACUTE_INHAL<br>,<br>TO_ACUTE_DERMAL     | Information Category/<br>Characterisation/Interactions | Assay file, Data file |
| 48                          | Repeated dose toxicity         | TO_REPEATED_ORAL,<br>TO_REPEATED_INHAL<br>TO_REPEATED_DERMAL | Information Category/<br>Characterisation/Interactions | Assay file, Data file |
| 49                          | Chronic toxicity               | TO_CARCIINOGENICITY,<br>TO_SENSITIZATION                     | Information Category/<br>Characterisation/Interactions | Assay file, Data file |
| 50                          | Reproductive toxicity          | TO_REPRODUCTI<br>ON                                          | Information Category/<br>Characterisation/Interactions | Assay file, Data file |
| 51                          | Developmental toxicity         | TO_DEVELOPMEN<br>TAL                                         | Information Category/<br>Characterisation/Interactions | Assay file, Data file |
| 52                          | Genetic toxicity               | TO_GENETIC_IN_V<br>ITRO,<br>TO_GENETIC_IN_V<br>IVO           | Information Category/<br>Characterisation/Interactions | Assay file, Data file |
| 53                          | Experience with human exposure | TO_EXPOSURE_OT<br>HER                                        | Information Category/<br>Characterisation/Interactions | Assay file, Data file |
| 54                          | Other relevant test data       | TO_OTHER                                                     | Information Category/<br>Characterisation/Interactions | Assay file, Data file |
| <b>Material Safety</b>      |                                |                                                              |                                                        |                       |
| 55                          | Flammability                   | PC_AUTO_FLAMM,<br>PC_FLAMM                                   | Information Category/<br>Characterisation/Interactions | Assay file, Data file |
| 56                          | Explosivity                    |                                                              | Information Category/<br>Characterisation/Interactions | Assay file, Data file |
| 57                          | Incompatibility                |                                                              | Information Category/<br>Characterisation/Interactions | Assay file, Data file |
